# Supplementary material for: High-resolution mapping of on-road vehicle emissions with real-time traffic datasets based on big data
Source: Copernicus journal article supplement (doi:10.5194/egusphere-2024-2791), 2024-10-11
Supplement: Supplementary file 1 [file egusphere-2024-2791-supplement.pdf]

1 *Supplementary Information for*

2 **High-resolution mapping of on-road vehicle emissions with real-time**  
3 **traffic datasets based on big data**

4 Yujia Wang<sup>1</sup>, Hongbin Wang<sup>2</sup>, Bo Zhang<sup>2</sup>, Peng Liu<sup>2</sup>, Xinfeng Wang<sup>1,\*</sup>, Shuchun Si<sup>3</sup>, Likun Xue<sup>1</sup>,  
5 Qingzhu Zhang<sup>1</sup>, Qiao Wang<sup>1</sup>

6 <sup>1</sup>Environmental Research Institute, Shandong University, Qingdao 266237, China

7 <sup>2</sup>Traffic Police Detachment of Jinan Public Security Bureau, Jinan 250014, China

8 <sup>3</sup>School of Physics, Shandong University, Jinan 250100, China

9

10 *\*Correspondence to:* Xinfeng Wang (xinfengwang@sdu.edu.cn)

11

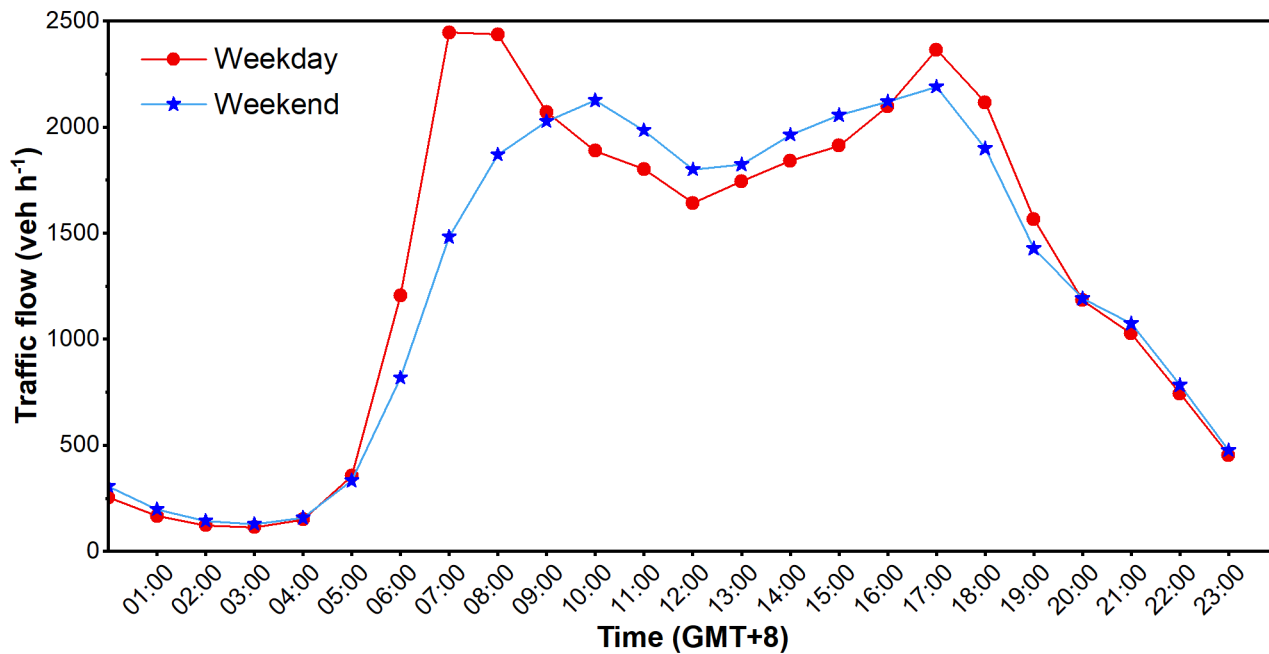

12

13 **Figure S1.** Hourly variation of traffic flows on weekdays and weekends.

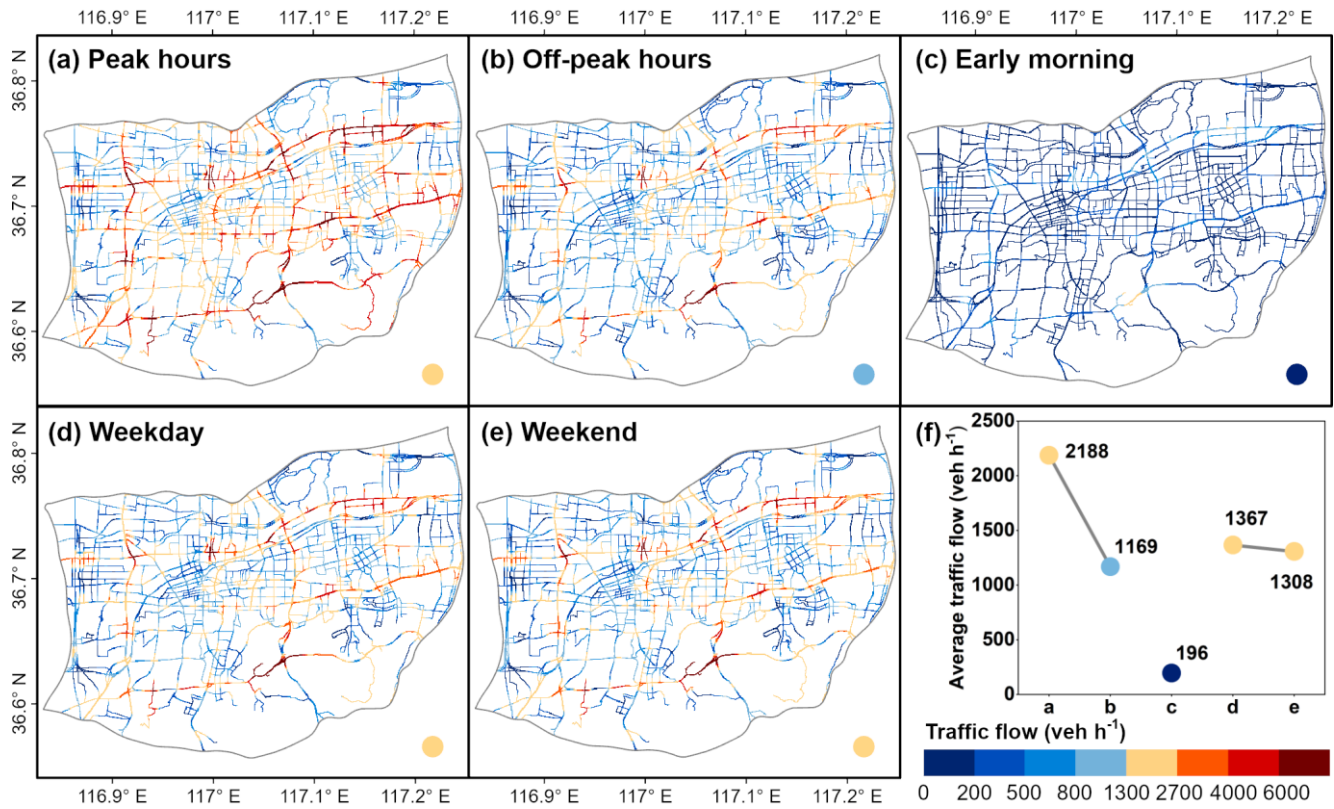

14

15 **Figure S2.** High-resolution mapping of traffic flows during (a) peak hours, (b) off-peak hours, (c) early morning, (d)  
 16 weekday, and (e) weekend and (f) average traffic flows during each time period.

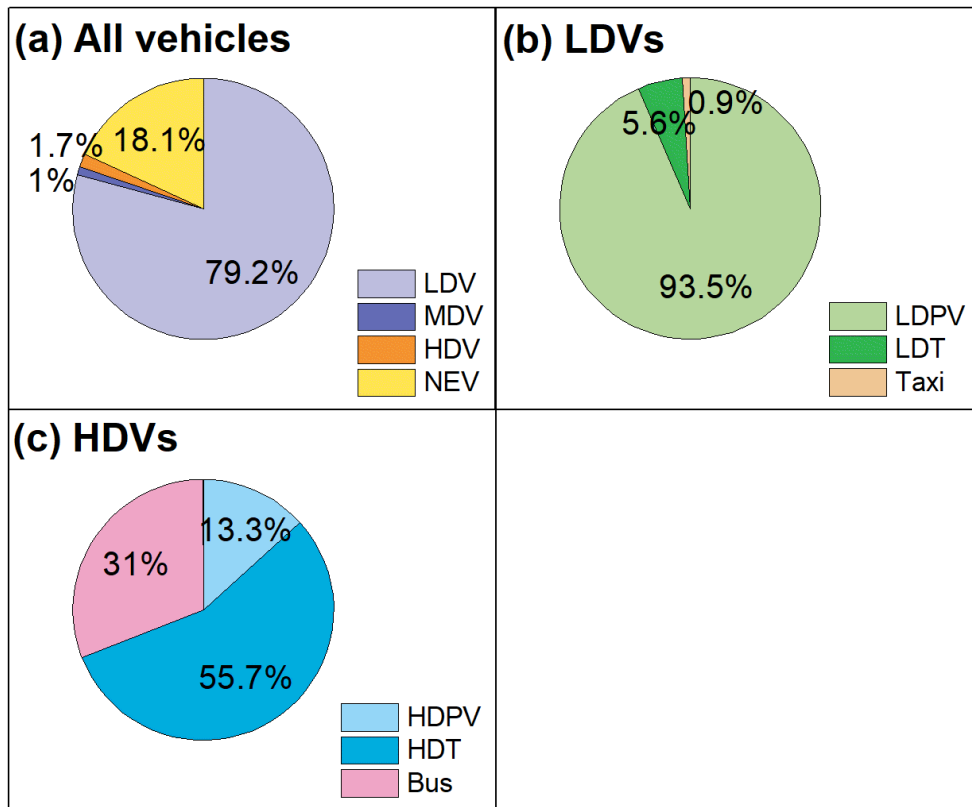

17

18 **Figure S3.** Composition of on-road vehicles for (a) all vehicles, (b) light-duty vehicles, (c) heavy-duty vehicles.

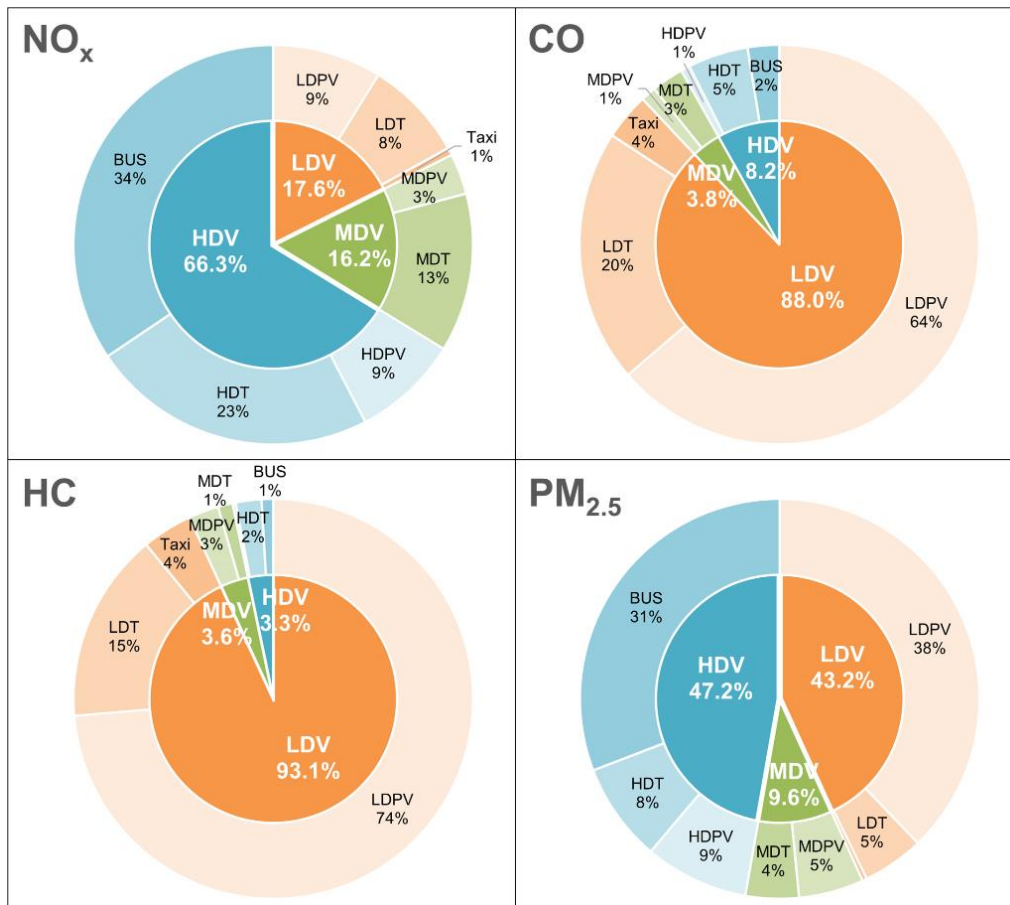

19

20 **Figure S4.** Emissions contribution of different vehicle types.

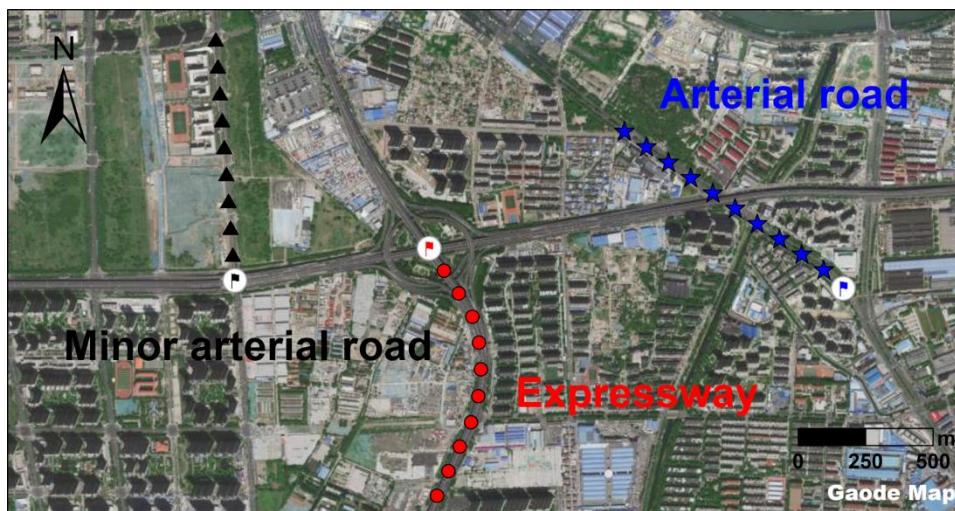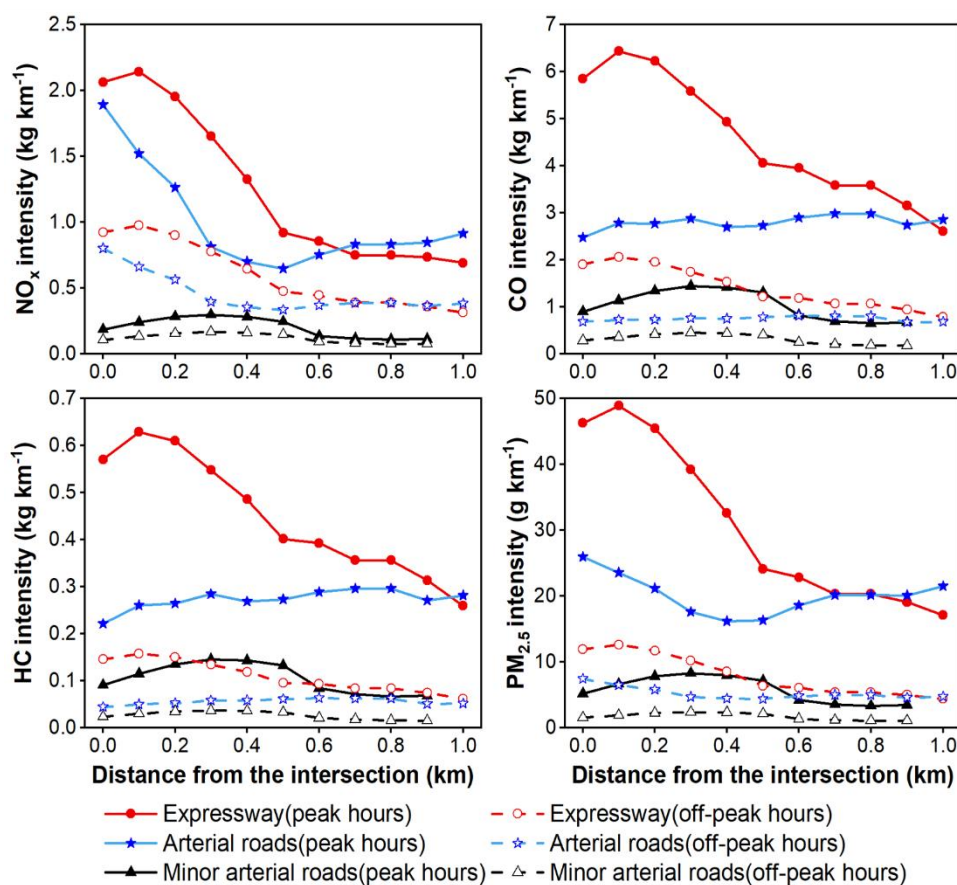

21

22 **Figure S5.** Emission variations at the intersections of expressways (i.e., Second Ring West Elevated Road), arterial roads  
 23 (i.e., Jiqi Road) and minor arterial roads (i.e., Binzhou Road). Emission intensities are plotted as a function of cumulative  
 24 distance from the intersections. Map data © 2024, Gaode Map.

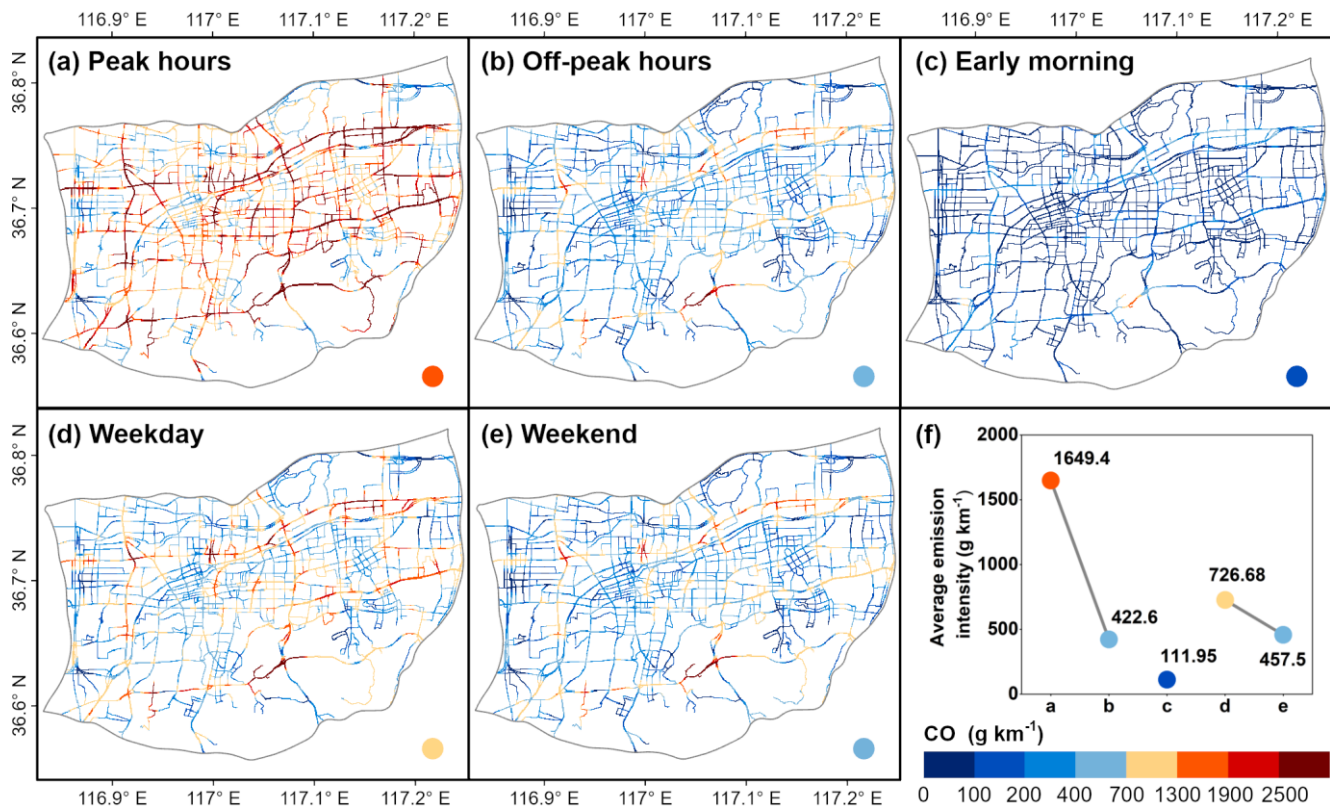

25

26 **Figure S6.** High-resolution mapping of on-road vehicle CO emissions during (a) peak hours, (b) off-peak hours, (c)  
 27 early morning, (d) weekday, and (e) weekend and (f) average emission intensities of CO during each time period.

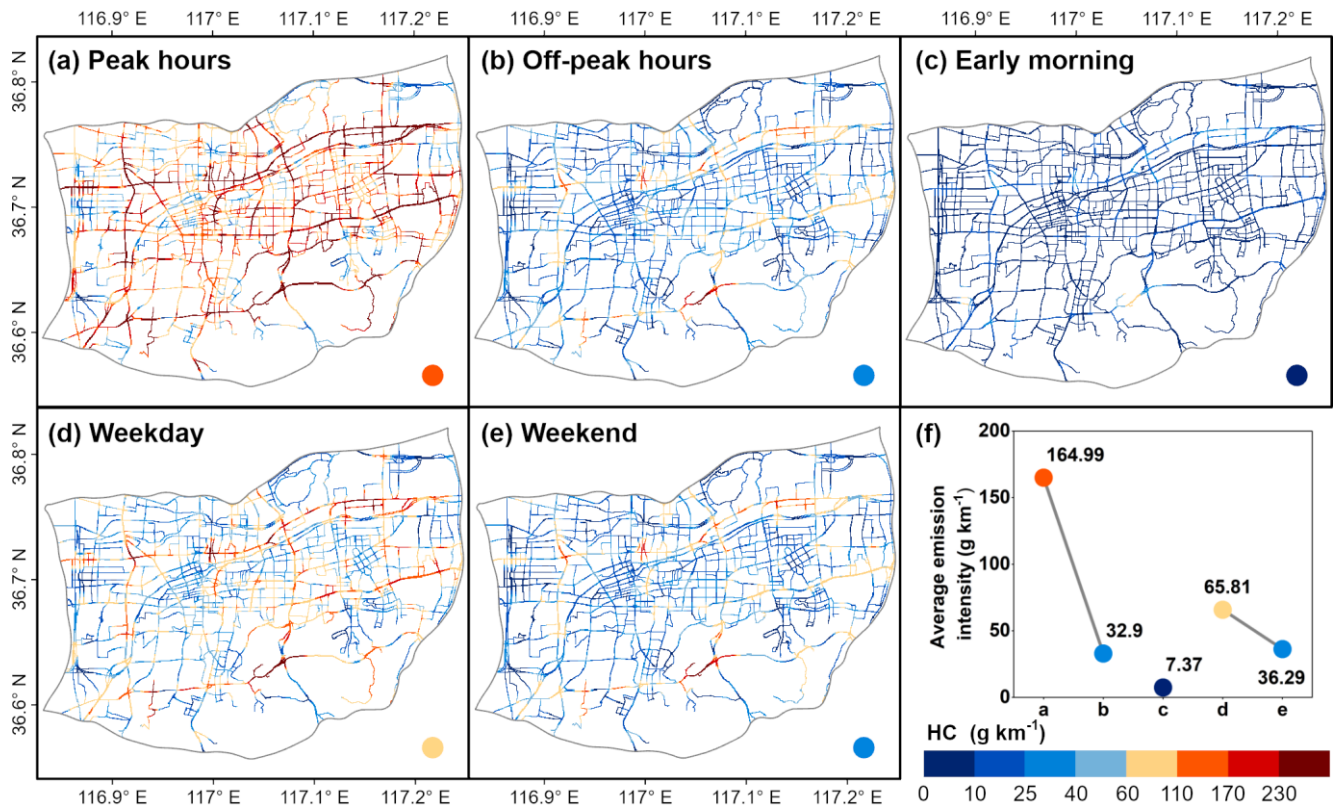

29

30 **Figure S7.** High-resolution mapping of on-road vehicle HC emissions during (a) peak hours, (b) off-peak hours, (c)  
 31 early morning, (d) weekday, and (e) weekend and (f) average emission intensities of HC during each time period.



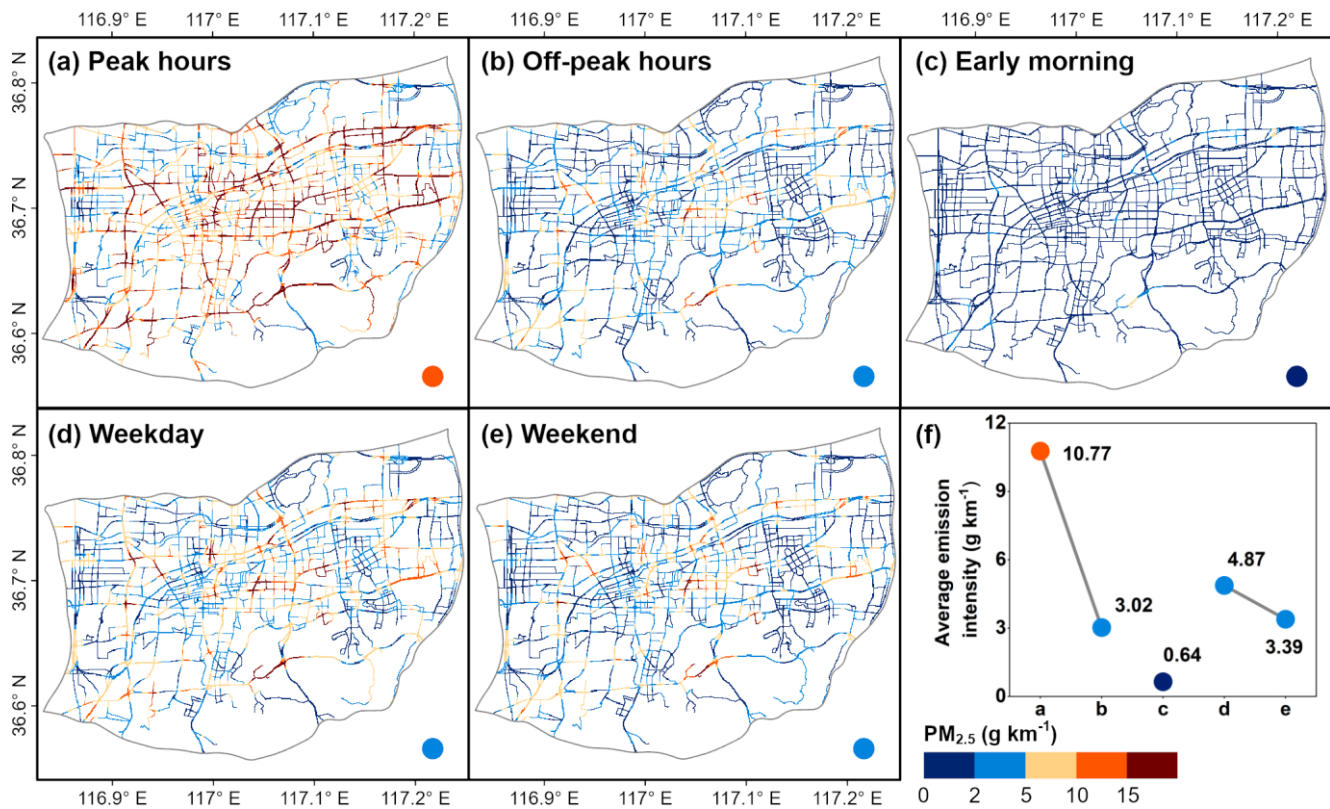

32

33 **Figure S8.** High-resolution mapping of on-road vehicle PM<sub>2.5</sub> emissions during (a) peak hours, (b) off-peak hours, (c)  
 34 early morning, (d) weekday, and (e) weekend and (f) average emission intensities of PM<sub>2.5</sub> during each time period.

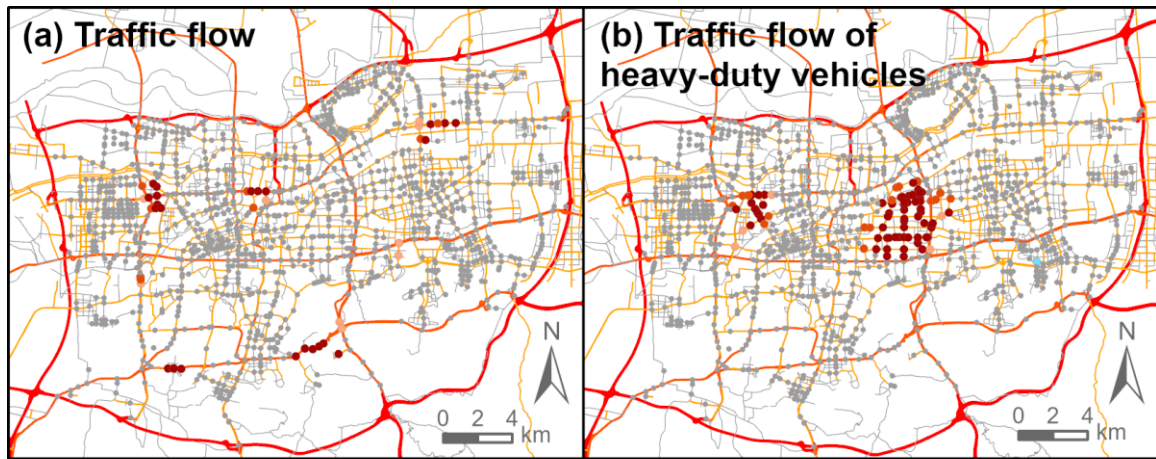

- Hot spots with a confidence level of 99%
- Hot spots with a confidence level of 95%
- Hot spots with a confidence level of 90%
- Non significant spots
- Cold spots with a confidence level of 99%
- Cold spots with a confidence level of 95%
- Cold spots with a confidence level of 90%

35

36 **Figure S9.** Spatial distributions of hot and cold spots of traffic flows for (a) total vehicles and (b) heavy-duty vehicles.

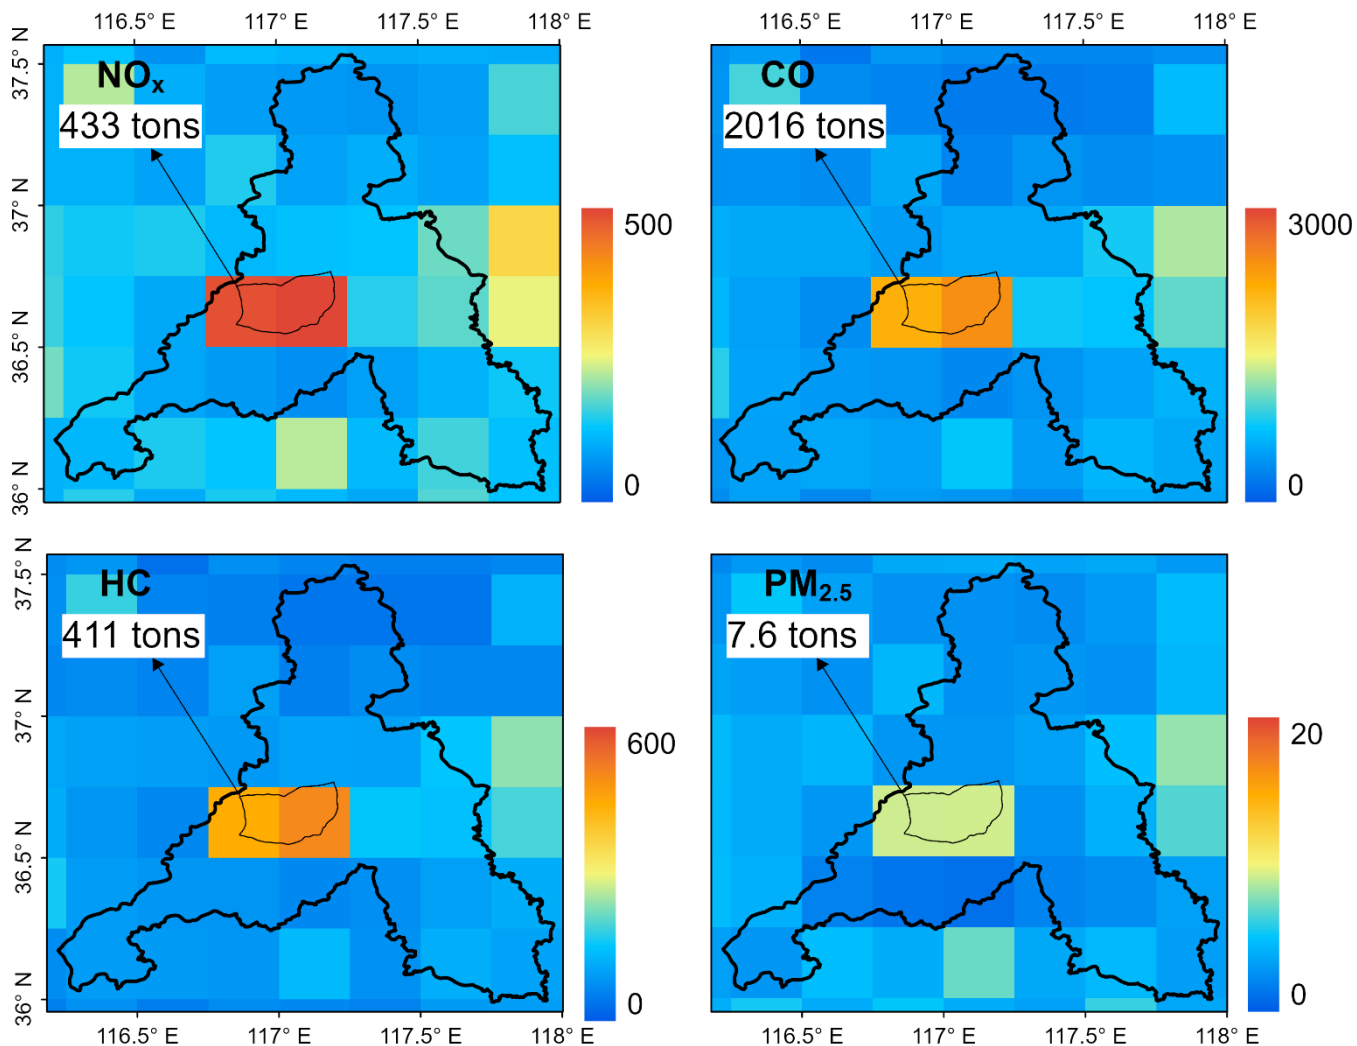

37  
 38 **Figure S10.** Spatial distributions of monthly gasoline and diesel vehicle emissions in Jinan in MEICv1.4. The numbers  
 39 marked within the white box represent the emissions within the study area from the MEICv1.4. Based on the proportions  
 40 of gasoline and diesel vehicles in transportation emissions in Shandong Province in MEICv1.4, the gasoline and diesel  
 41 vehicle emissions in MEICv1.4 in the study area were estimated.

42 **Table S1.** Definition and abbreviation of vehicle types.

| Vehicle classification        | Abbreviation | Description                                   |
|-------------------------------|--------------|-----------------------------------------------|
| Light-duty passenger vehicle  | LDPV         | VC <sup>a</sup> < 6 m and PC <sup>b</sup> ≤ 9 |
| Medium-duty passenger vehicle | MDPV         | VC < 6 m and 9 < PC < 20                      |
| Heavy-duty passenger vehicle  | HDPV         | VC ≥ 6 m and PC ≥ 20                          |
| Light-Duty Truck              | LDT          | VC < 6 m GVW <sup>c</sup> ≤ 4500 kg           |
| Middle-Duty Truck             | MDT          | VC ≥ 6 m or 4500 kg < GVW ≤ 12 t              |
| Heavy-Duty Truck              | HDT          | GVW ≥ 12t                                     |
| Public bus                    | Bus          |                                               |
| Taxi                          | Taxi         |                                               |

43 Notes: <sup>a</sup> Vehicle commander, <sup>b</sup> Passenger capacity; <sup>c</sup> Gross vehicle weight.

44 **Table S2.** Hourly vehicle category distribution coefficients obtained from field surveys.

| Time  | Distribution coefficients of LDVs |       |       |       |       | Distribution coefficients of HDVs |       |       |
|-------|-----------------------------------|-------|-------|-------|-------|-----------------------------------|-------|-------|
|       | LDPVs                             | LDTs  | Taxis | MDPVs | MDTs  | HDPVs                             | HDTs  | Buses |
| 0:00  | 0.847                             | 0.072 | 0.026 | 0.001 | 0.054 | 0.002                             | 0.998 | 0.000 |
| 1:00  | 0.773                             | 0.144 | 0.025 | 0.005 | 0.053 | 0.005                             | 0.995 | 0.000 |
| 2:00  | 0.718                             | 0.204 | 0.013 | 0.003 | 0.062 | 0.000                             | 1.000 | 0.000 |
| 3:00  | 0.637                             | 0.252 | 0.024 | 0.000 | 0.088 | 0.000                             | 1.000 | 0.000 |
| 4:00  | 0.616                             | 0.325 | 0.010 | 0.002 | 0.047 | 0.010                             | 0.990 | 0.000 |
| 5:00  | 0.679                             | 0.269 | 0.011 | 0.007 | 0.034 | 0.063                             | 0.841 | 0.095 |
| 6:00  | 0.846                             | 0.104 | 0.014 | 0.020 | 0.016 | 0.446                             | 0.321 | 0.233 |
| 7:00  | 0.932                             | 0.051 | 0.006 | 0.009 | 0.002 | 0.541                             | 0.041 | 0.418 |
| 8:00  | 0.922                             | 0.064 | 0.008 | 0.004 | 0.002 | 0.145                             | 0.093 | 0.762 |
| 9:00  | 0.918                             | 0.057 | 0.010 | 0.003 | 0.011 | 0.093                             | 0.620 | 0.287 |
| 10:00 | 0.913                             | 0.062 | 0.010 | 0.004 | 0.011 | 0.028                             | 0.575 | 0.398 |
| 11:00 | 0.920                             | 0.060 | 0.012 | 0.001 | 0.007 | 0.028                             | 0.671 | 0.302 |
| 12:00 | 0.913                             | 0.066 | 0.007 | 0.004 | 0.010 | 0.035                             | 0.682 | 0.283 |
| 13:00 | 0.924                             | 0.057 | 0.008 | 0.002 | 0.009 | 0.035                             | 0.651 | 0.314 |
| 14:00 | 0.916                             | 0.060 | 0.008 | 0.002 | 0.014 | 0.040                             | 0.634 | 0.326 |
| 15:00 | 0.929                             | 0.051 | 0.010 | 0.002 | 0.008 | 0.035                             | 0.641 | 0.323 |
| 16:00 | 0.938                             | 0.042 | 0.011 | 0.005 | 0.004 | 0.066                             | 0.602 | 0.332 |
| 17:00 | 0.958                             | 0.028 | 0.006 | 0.007 | 0.000 | 0.398                             | 0.109 | 0.493 |
| 18:00 | 0.957                             | 0.030 | 0.006 | 0.006 | 0.001 | 0.451                             | 0.056 | 0.493 |
| 19:00 | 0.959                             | 0.026 | 0.010 | 0.004 | 0.002 | 0.139                             | 0.450 | 0.412 |
| 20:00 | 0.948                             | 0.028 | 0.012 | 0.003 | 0.010 | 0.045                             | 0.846 | 0.109 |
| 21:00 | 0.952                             | 0.024 | 0.009 | 0.000 | 0.014 | 0.044                             | 0.881 | 0.075 |
| 22:00 | 0.937                             | 0.031 | 0.014 | 0.000 | 0.017 | 0.007                             | 0.964 | 0.030 |
| 23:00 | 0.911                             | 0.052 | 0.012 | 0.001 | 0.025 | 0.004                             | 0.996 | 0.000 |

45

46 **Table S3.** Speed ranges for different types of roads during peak and off-peak hours.

| Time period    | Design speed (km h <sup>-1</sup> ) |             |                |                      |             |
|----------------|------------------------------------|-------------|----------------|----------------------|-------------|
|                | Highways                           | Expressways | Arterial roads | Minor arterial roads | Branch ways |
| Off-peak hours | >80                                | 60-80       | 40-60          | 30-40                | 20-30       |
| Peak hours     | 40-80                              | 30-40       | 20-30          | 20-30                | 20-30       |

47 Notes: Speed ranges during off-peak hours are set to the design speeds for each road type. Speed ranges during peak hours are adjusted based  
 48 on the different congestion states (smooth, slow, congested, severely congested) for different road types in Gaode Maps  
 49 (<https://www.amap.com/>).
